# Supplementary material
Source: PubMed Central journal article supplement (PMC6246397)
Supplement: supplemental_fig_1_mdx487.pdf [file supplemental_fig_1_mdx487.pdf]

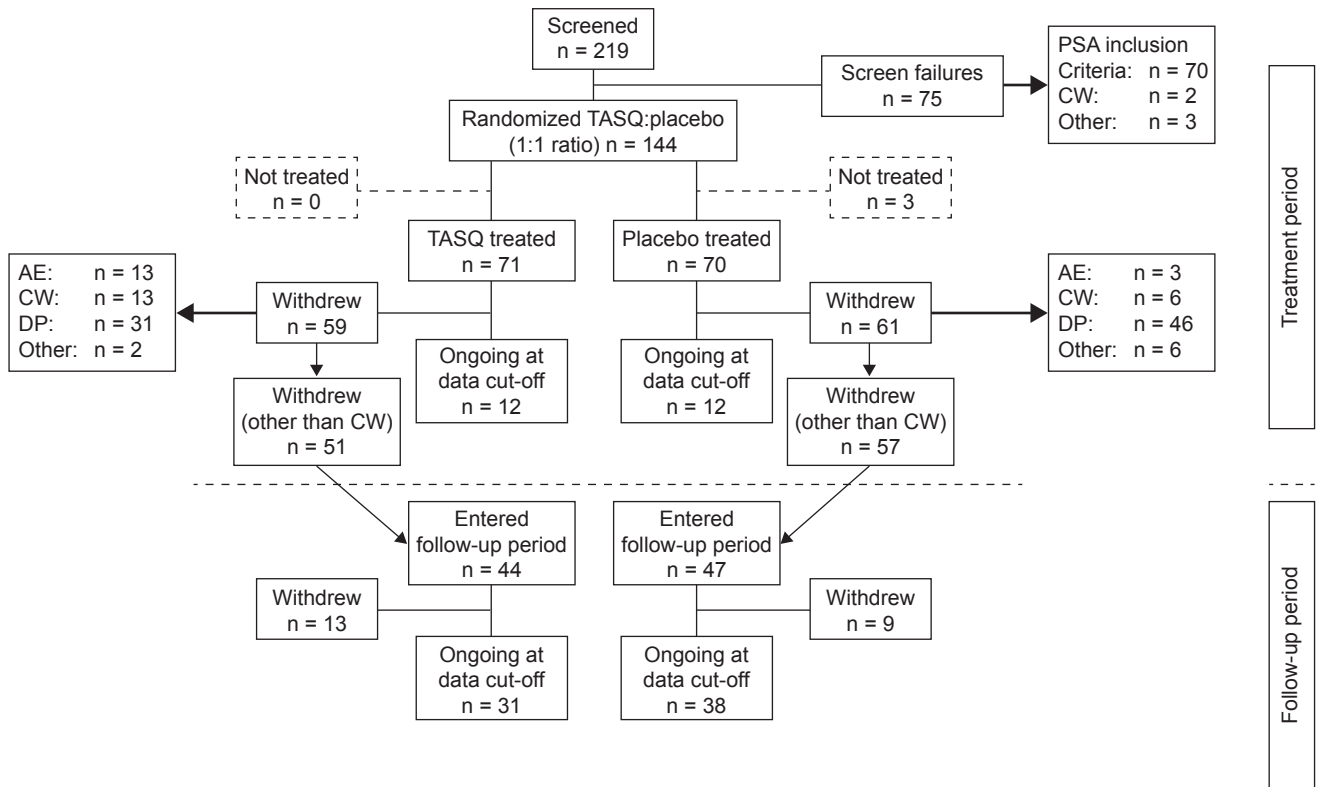

Following sponsor decision, all the ongoing patients discontinued study treatments at the latest on May 2015
